# Supplementary material for: Simultaneous qualitative and quantitative determination of phenylethanoid glycosides and flavanoid compounds in Callicarpa kwangtungensis Chun by HPLC-ESI-IT-TOF-MS/MS coupled with HPLC-DAD
Source: Royal Society of Chemistry journal article supplement (doi:10.1039/c6ay01728b), 2016-01-01
Supplement: c6ay01728b1.pdf [file c6ay01728b1.pdf]

Supplemental Table A.1 Detail information of 11 batches of *Callicarpa kwangtungensis* chun. in China

| Batch no. | Collect location                        | Collect time      |
|-----------|-----------------------------------------|-------------------|
| 1         | Pingxiang City, Jiangxi Province, China | 2013-10, annual   |
| 2         | Pingxiang City, Jiangxi Province, China | 2013-05, annual   |
| 3         | Anyuan City, Jiangxi Province, China    | 2014-05, annual   |
| 4         | Xiangdong City, Jiangxi Province, China | 2012-10, annual   |
| 5         | Tonggu City, Jiangxi Province, China    | 2012-11, biennial |
| 6         | Tonggu City, Jiangxi Province, China    | 2012-11, annual   |
| 7         | Ganzhou City, Jiangxi Province, China   | 2013-05, annual   |
| 8         | Kaili City,Guizhou Province, China      | 2012-10, annual   |
| 9         | Guiyang,Guizhou Province, China         | 2014-09, annual   |
| 10        | Guiyang,Guizhou Province, China         | 2012-10, annual   |
| 11        | Anlong,Guizhou Province, China          | 2012-11, annual   |

Supplemental Table A.2 Mass spectral and UV data of unknown compounds from *Callicarpa kwangtungensis* Chun

| NO. <sup>a</sup> | RT(min) | UV $\lambda_{\max}$ (nm) | MS <sup>1</sup>                                              | MS <sup>2</sup> /MS <sup>3</sup> data   | Molecular formula                               | Error (ppm) |
|------------------|---------|--------------------------|--------------------------------------------------------------|-----------------------------------------|-------------------------------------------------|-------------|
| 1                | 4.820   | 328                      | 643.1838 [M+Na] <sup>+</sup><br>619.1827 [M-H] <sup>-</sup>  | 569.6507、365.0822、<br>301.0867、152.0916 | C <sub>26</sub> H <sub>36</sub> O <sub>17</sub> | 0.97        |
| 4                | 5.600   | 250、329                  | 405.0269 [M-H] <sup>-</sup>                                  | 191.0146、111.0047                       | C <sub>15</sub> H <sub>14</sub> O <sub>9</sub>  | 8.64        |
| 7                | 8.658   | 253、276                  | 475.1828 [M-H] <sup>-</sup>                                  | 458.9120                                | C <sub>21</sub> H <sub>32</sub> O <sub>12</sub> | 1.47        |
| 8                | 9.918   | 250、283、<br>330          | 392.1140 [M-H] <sup>-</sup>                                  | 383.1175                                | C <sub>22</sub> H <sub>19</sub> NO <sub>6</sub> | 4.08        |
| 9                | 10.208  | 250、283、<br>330          | 392.1215[M-H] <sup>-</sup>                                   | 383.1175、215.1670                       | C <sub>14</sub> H <sub>21</sub> NO <sub>9</sub> | 3.32        |
| 12               | 10.997  | 278、328                  | 458.1434[M-H] <sup>-</sup>                                   | 377.1100、179.0439                       | C <sub>40</sub> H <sub>54</sub> O <sub>24</sub> | 0.87        |
| 15               | 15.563  | 267、337                  | 429.1684[M-H] <sup>-</sup>                                   | 163.0594                                | C <sub>20</sub> H <sub>30</sub> O <sub>10</sub> | -0.47       |
| 30               | 45.948  | 270、330                  | 465.1430 [M+Cl] <sup>-</sup><br>453.3422 [M+Na] <sup>+</sup> | 327.2526、237.3673                       |                                                 | 1.76        |
| 31               | 46.895  | 237、328                  | 747.2442[M+Na] <sup>+</sup><br>723.2369[M-H] <sup>-</sup>    | 561.2108                                | C <sub>41</sub> H <sub>40</sub> O <sub>12</sub> | -0.28       |
| 35               | 51.655  | 270                      | 329.2297[M-H] <sup>-</sup><br>353.2316[M+Na] <sup>+</sup>    | 229.1413、211.1303                       | C <sub>18</sub> H <sub>34</sub> O <sub>5</sub>  | 3.64        |

<sup>a</sup> The notation for analytes refer to Fig. 2.

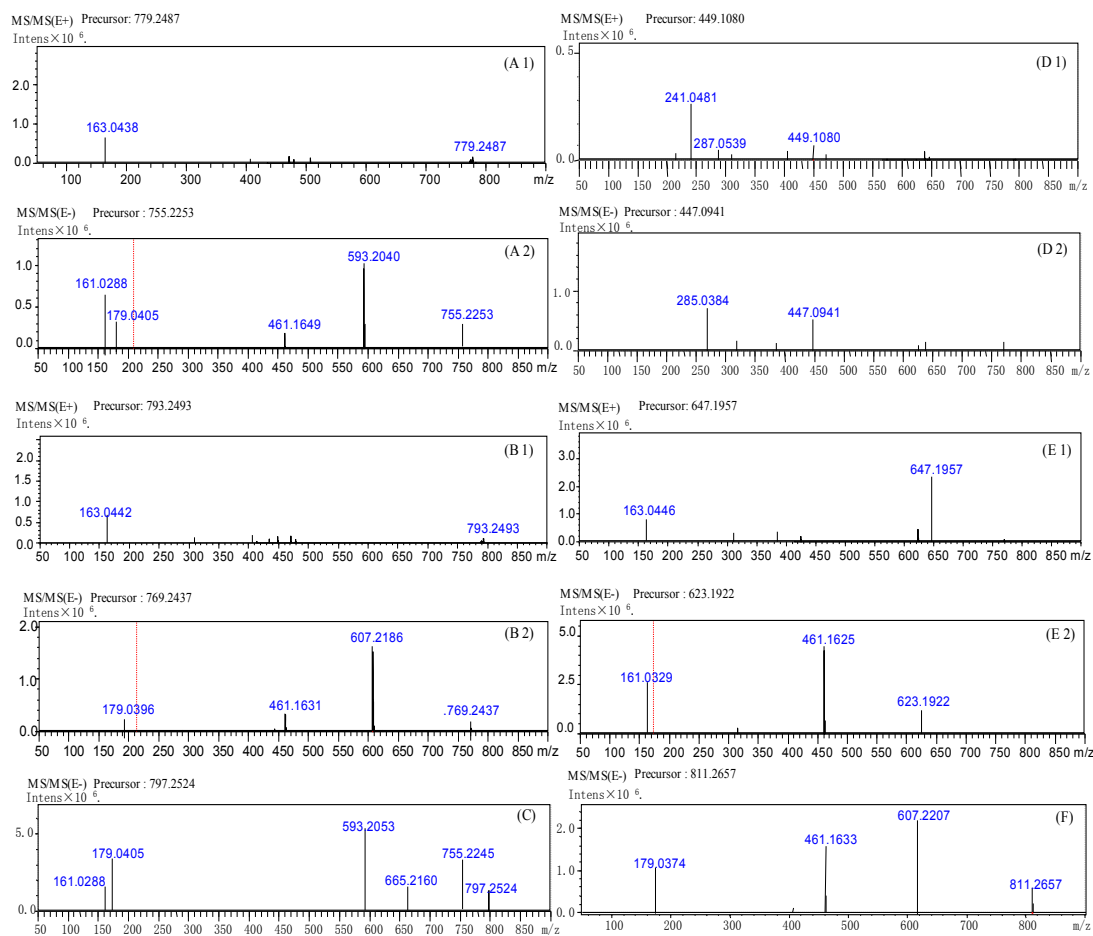

Supplemental Fig. A1 The MS<sup>2</sup> spectra of (A1) forsythoside B, (B1) poliumoside, (D1) luteolin-7-*O*- $\beta$ -glucoside, (E1) verbascoside in positive ion mode and (A2) forsythoside B, (B2) poliumoside, (C) 2'-acetyl forsythoside B, (D2) luteolin-7-*O*- $\beta$ -glucoside, (E2) verbascoside, (F) 2'-acetyl poliumoside in negative ion mode.

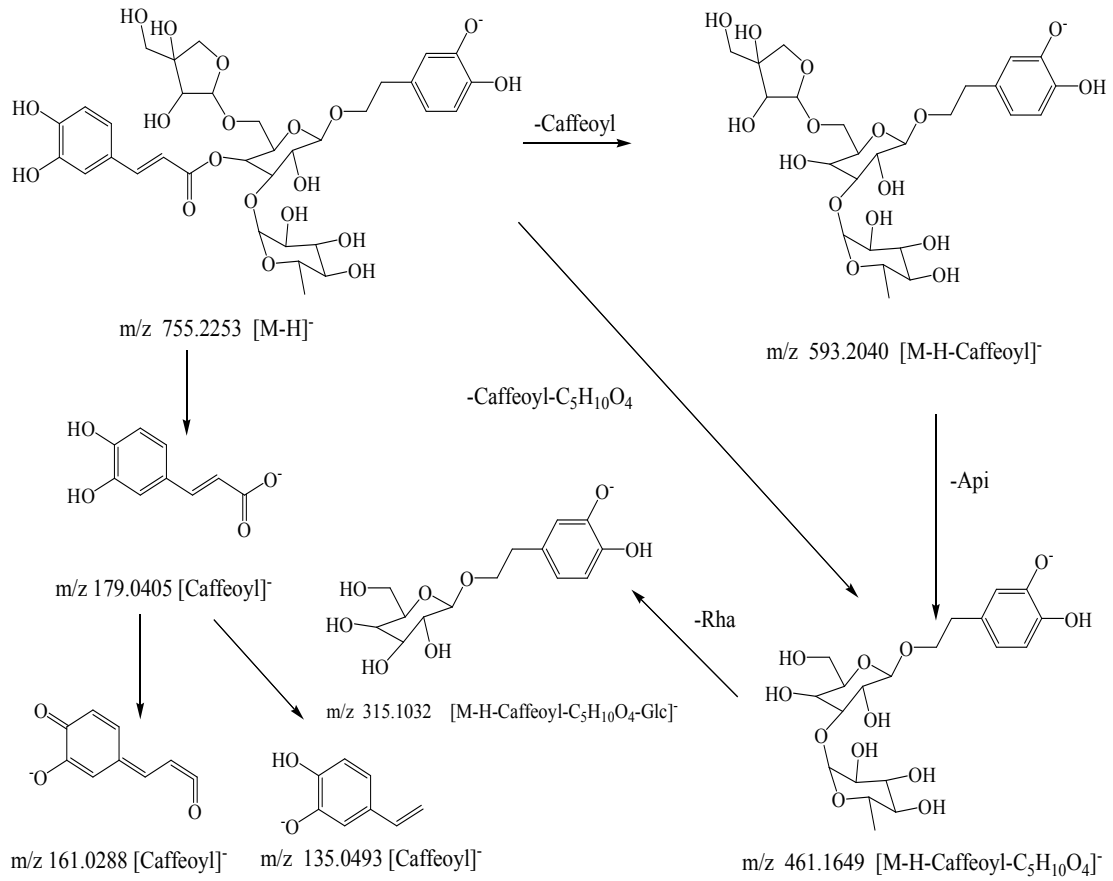

Supplemental Fig. A2 Proposed fragmentation pathway for forsythoside B.

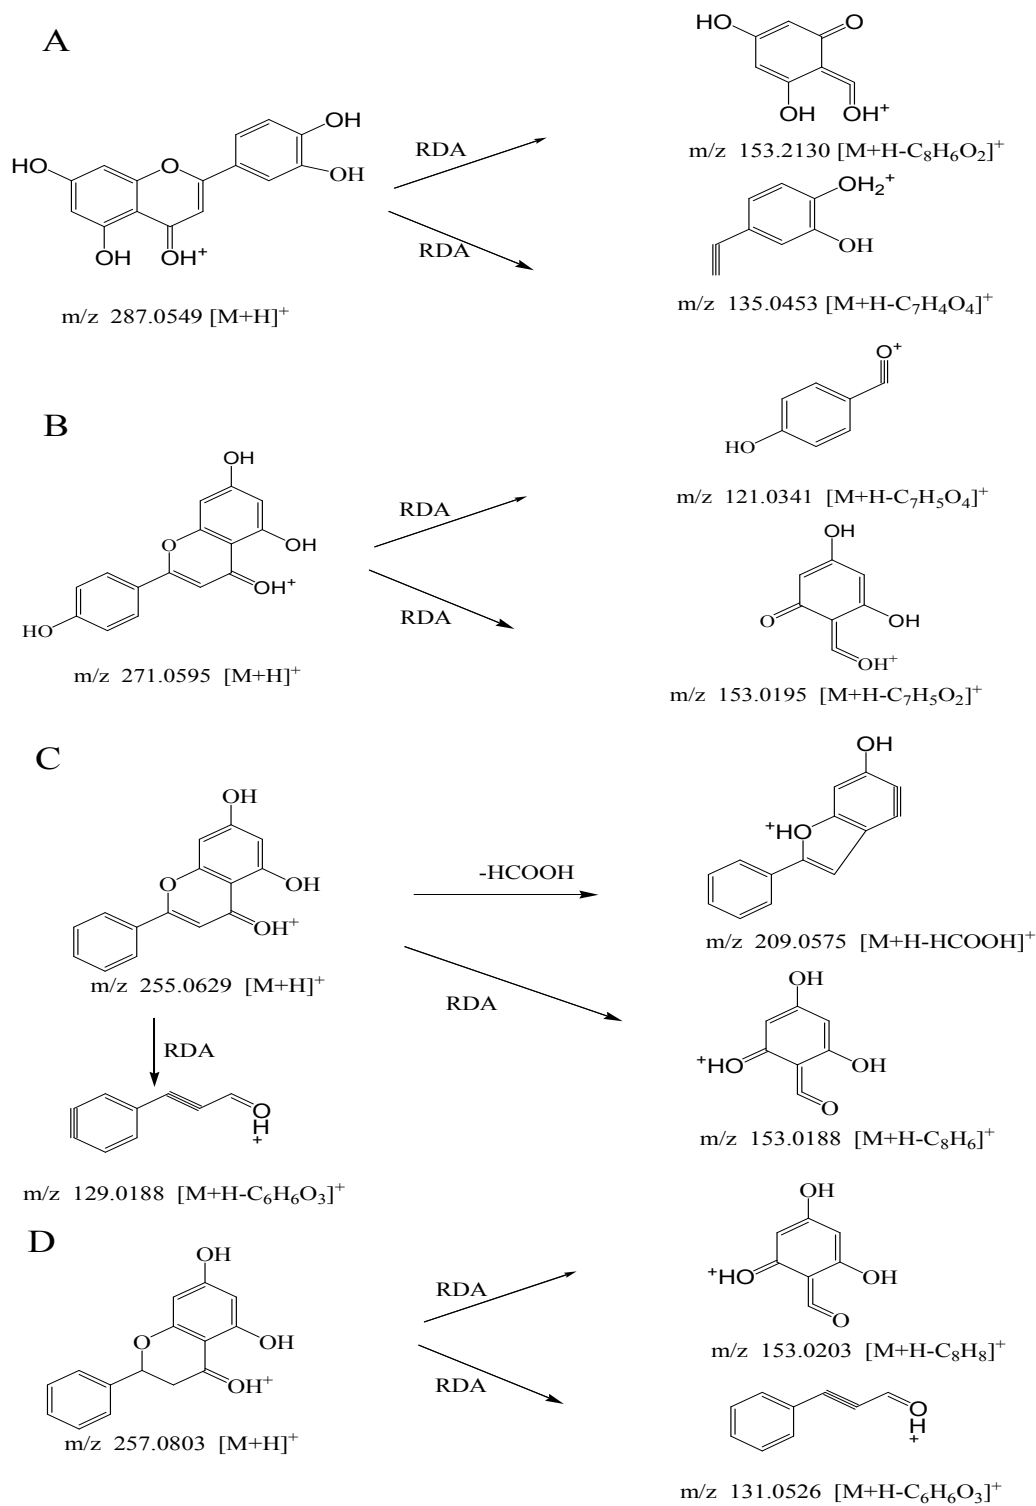

Supplemental Fig. A3 Proposed fragmentation pathways for luteolin (A, C32), apigenin (B, C33), chrysin (C, C39) and 5,7-dihydroxy-2-phenylchroman-4-one (D, C40).

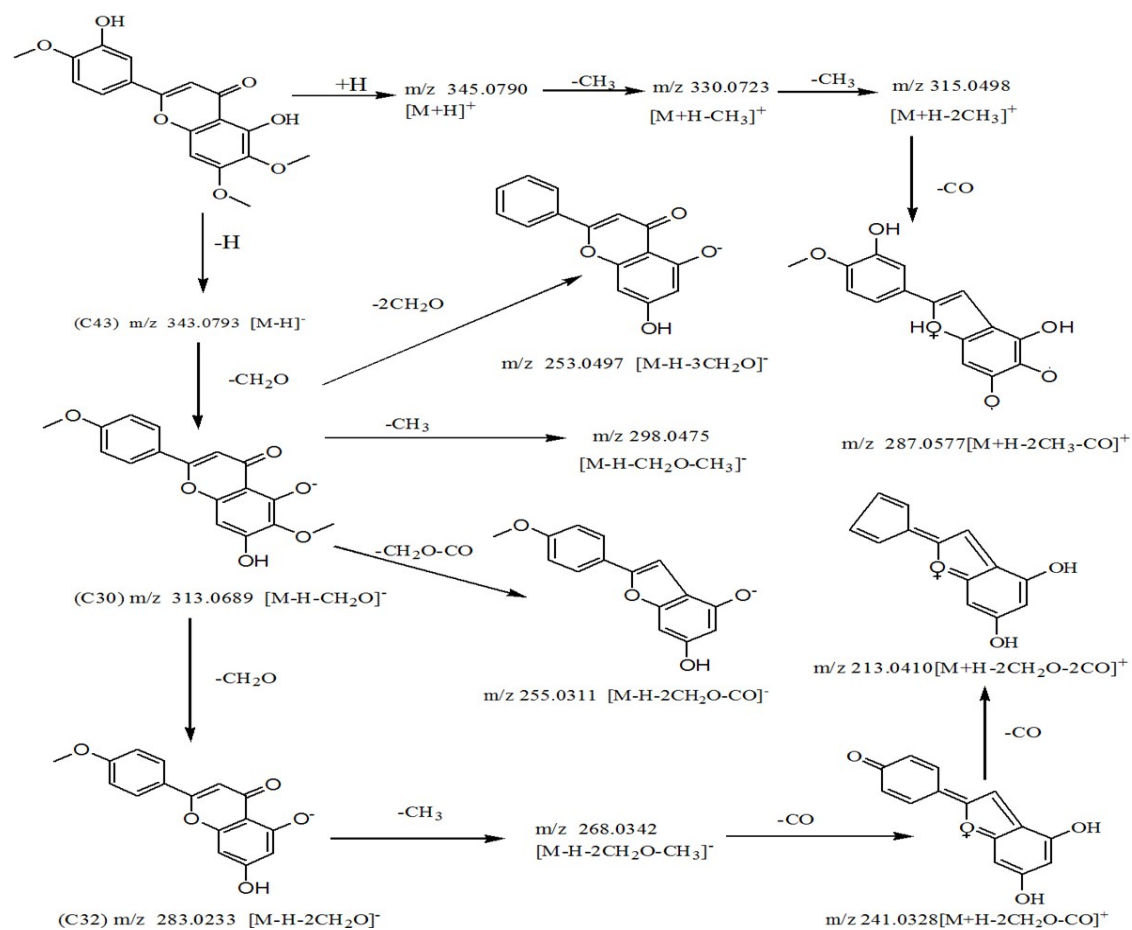

Supplemental Fig. A4 Proposed fragmentation pathway for 5,7-dihydroxy-2-(3-hydroxy-4-methoxy-phenyl)-6,7-dimethoxy-chromone (C43).

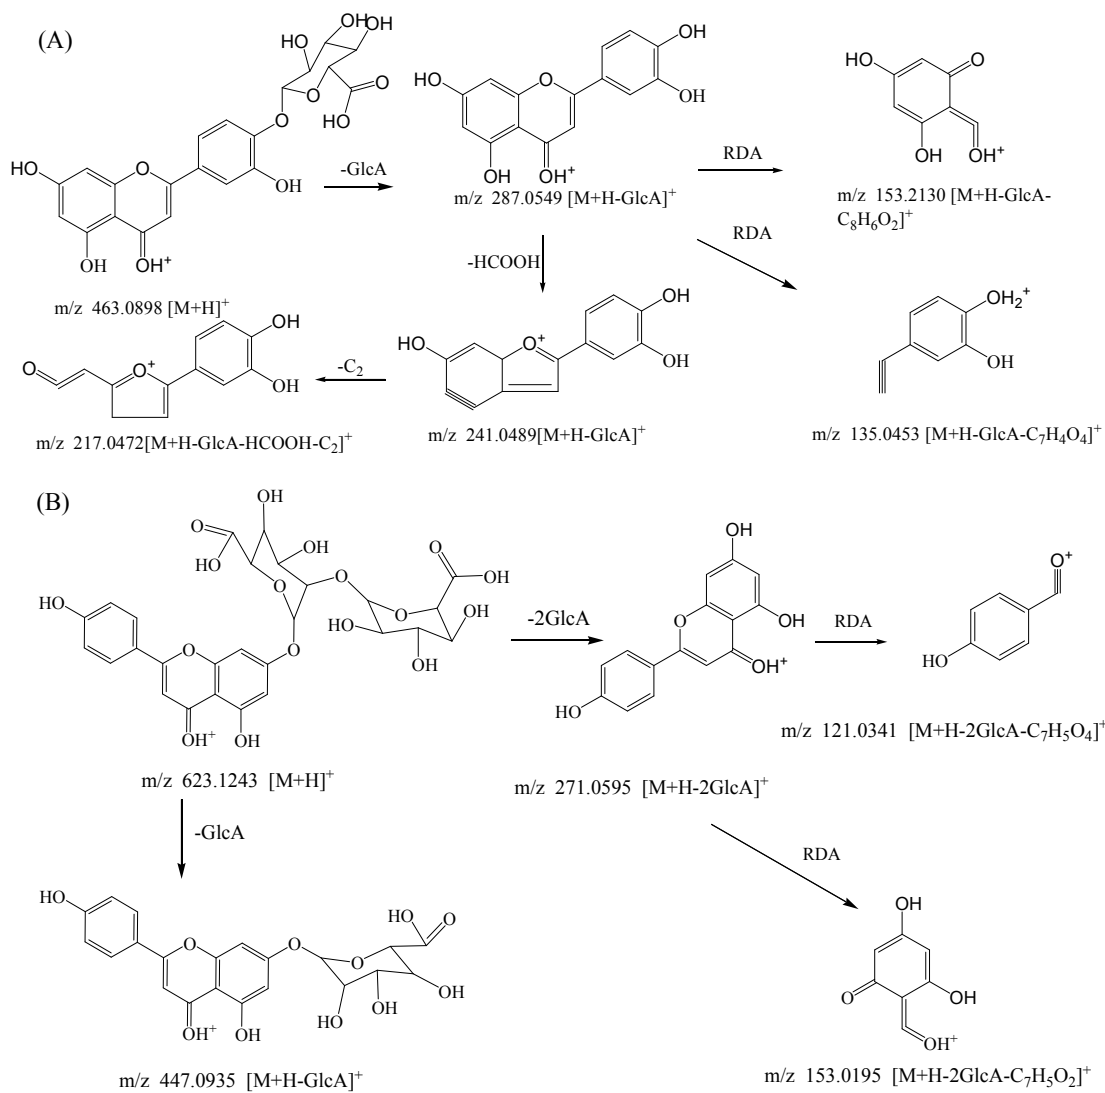

Supplemental Fig. A5 Proposed fragmentation pathways for Luteolin-3'-O- $\beta$ -glucuronide (A, C26) and Apigenin-7-O-diglycuronides (B, C22).

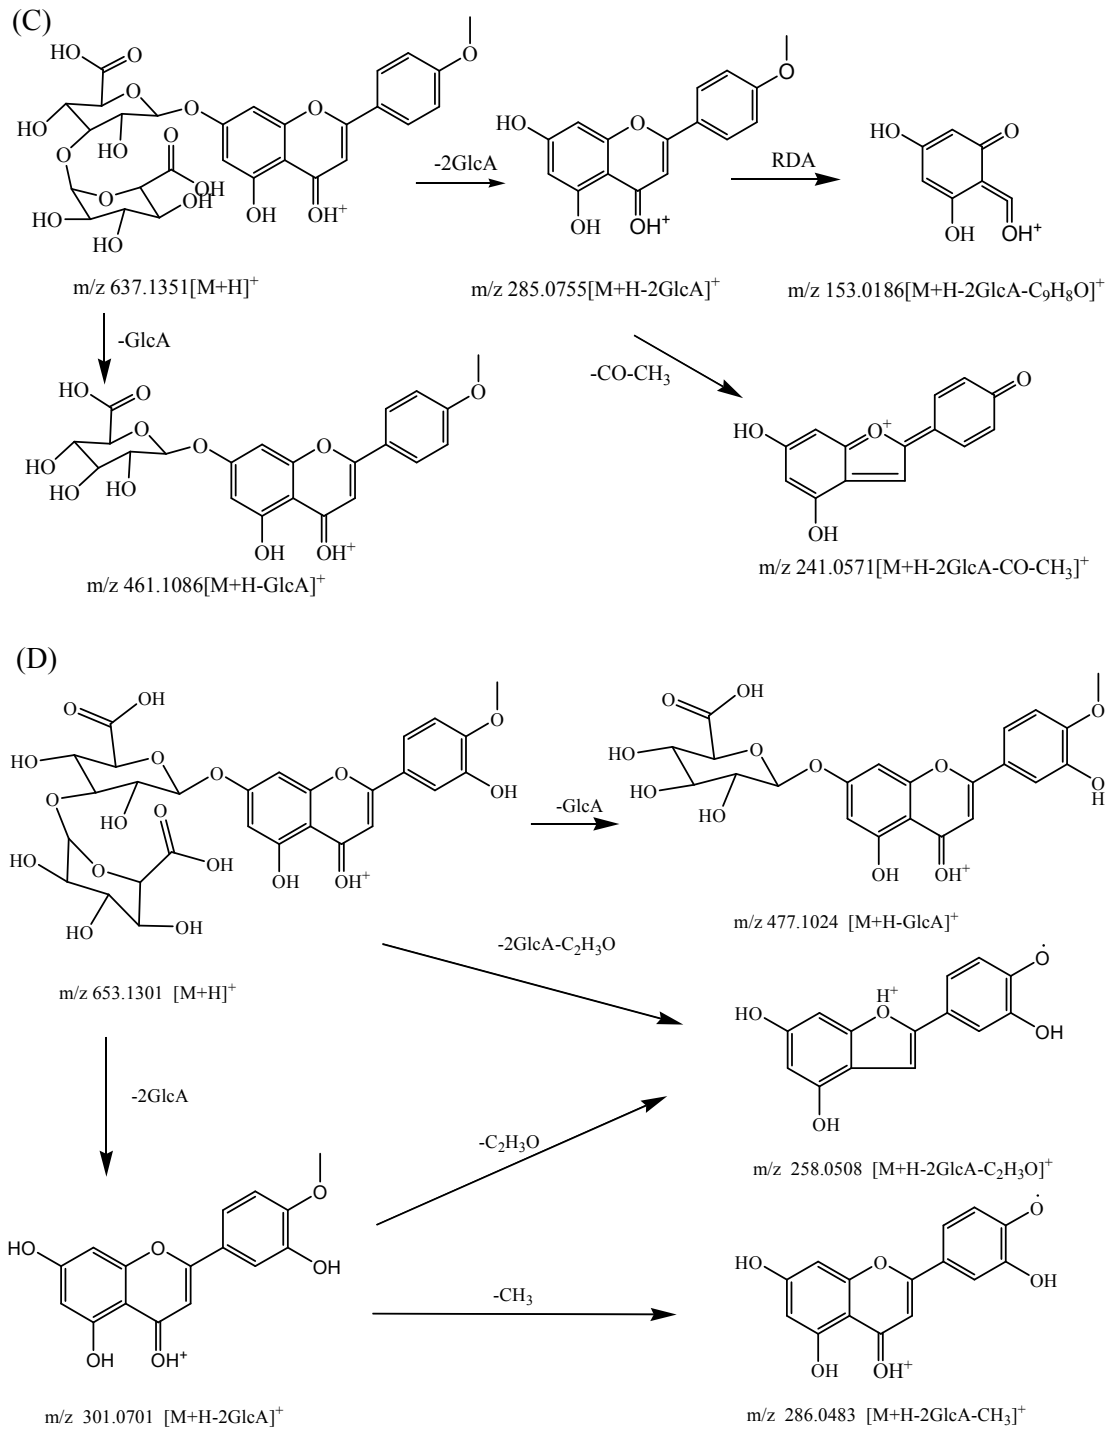

Supplemental Fig. A6 Proposed fragmentation pathways for Acacetin-7-O-diglycuronides (C, C34) and Diosmetin-7-O-diglycuronides (D, C25).



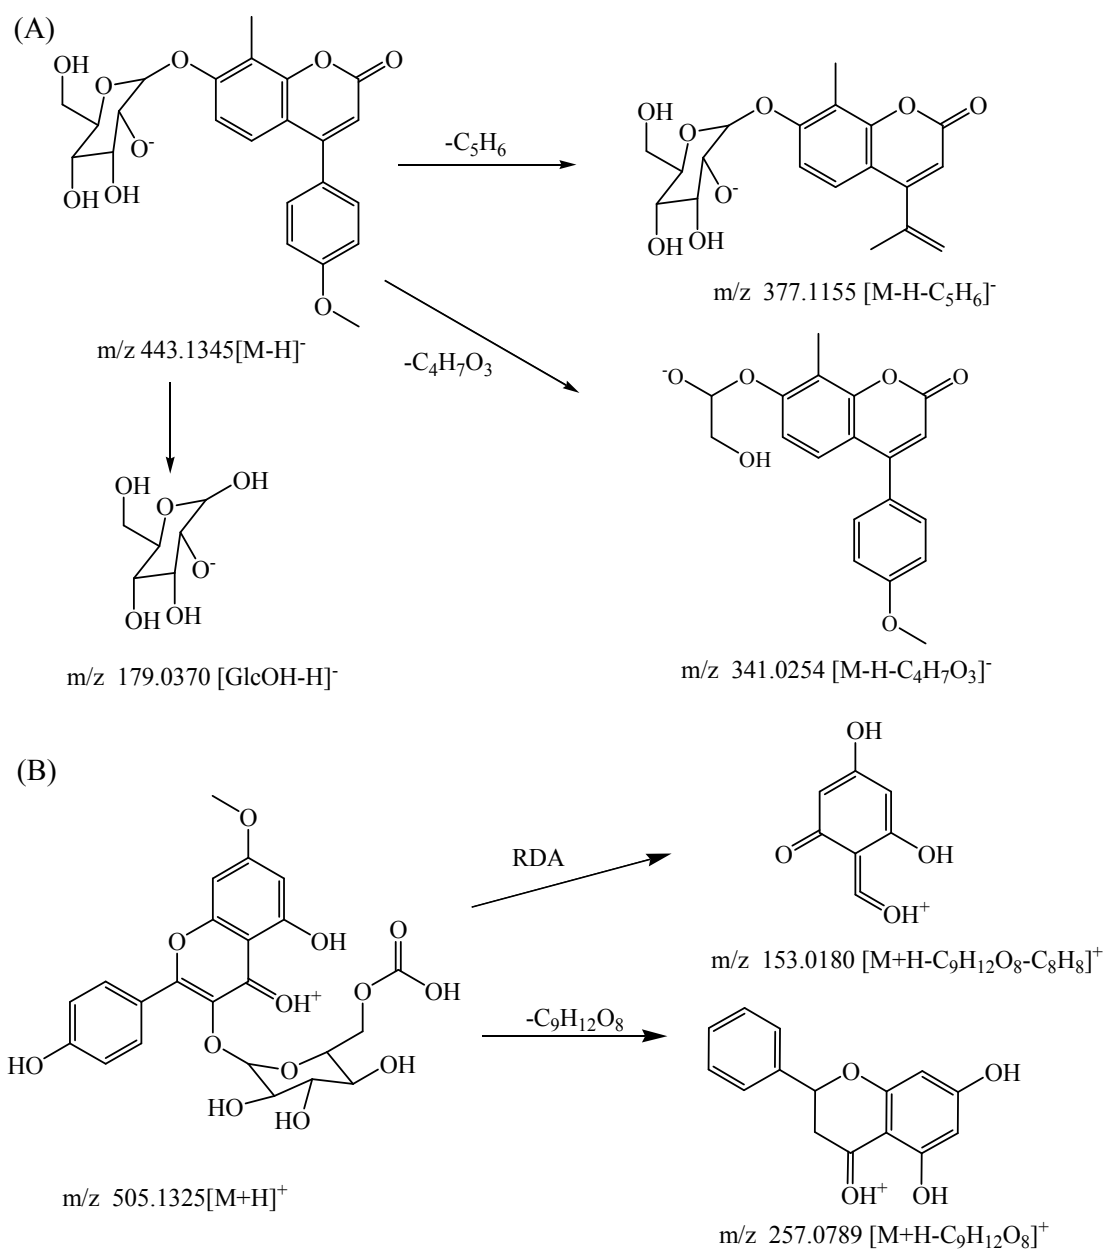

Supplemental Fig. A7 Proposed fragmentation pathways for 4-(4-methoxyphenyl)-8-methyl-7-(3,4,5-trihydroxy-6-(hydroxymethyl)-tetrahydro-2H-pyran-2-yl)oxy)-2H-chromen-2-one (A, C16) and Neocomplanoside (B, C37).

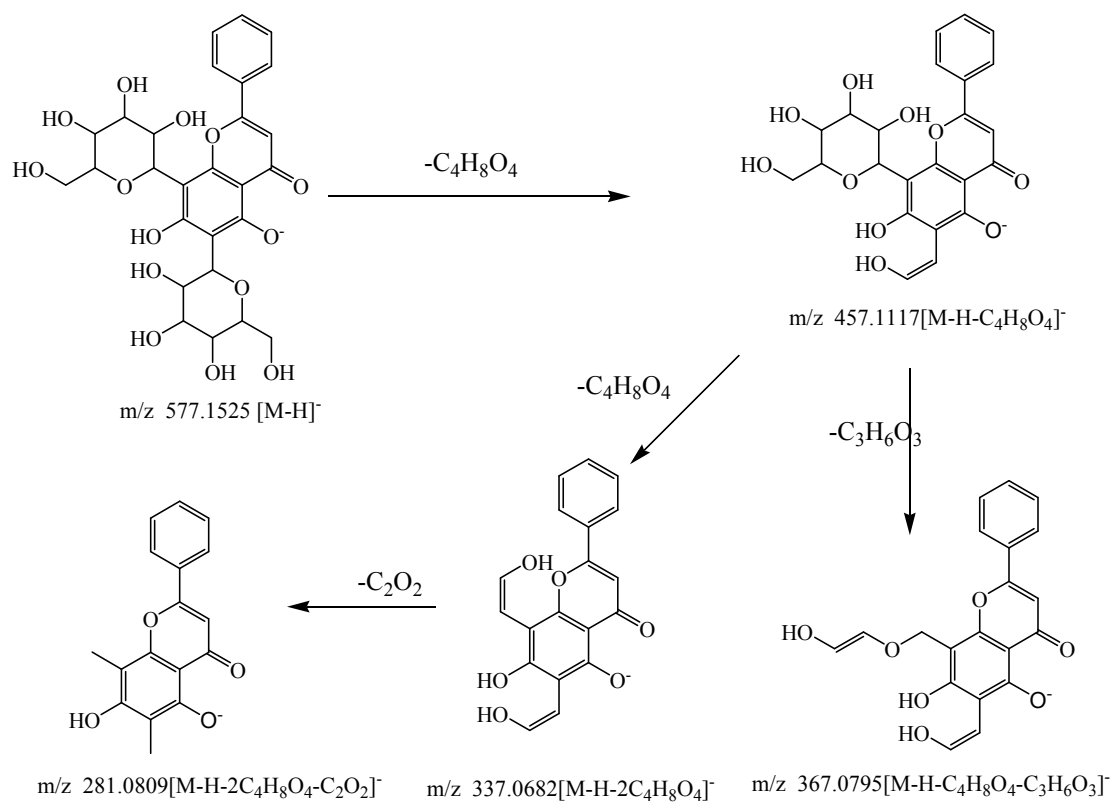

Supplemental Fig. A8 Proposed fragmentation pathway for Chrysin-6,8-two-C-glycosides (C13).

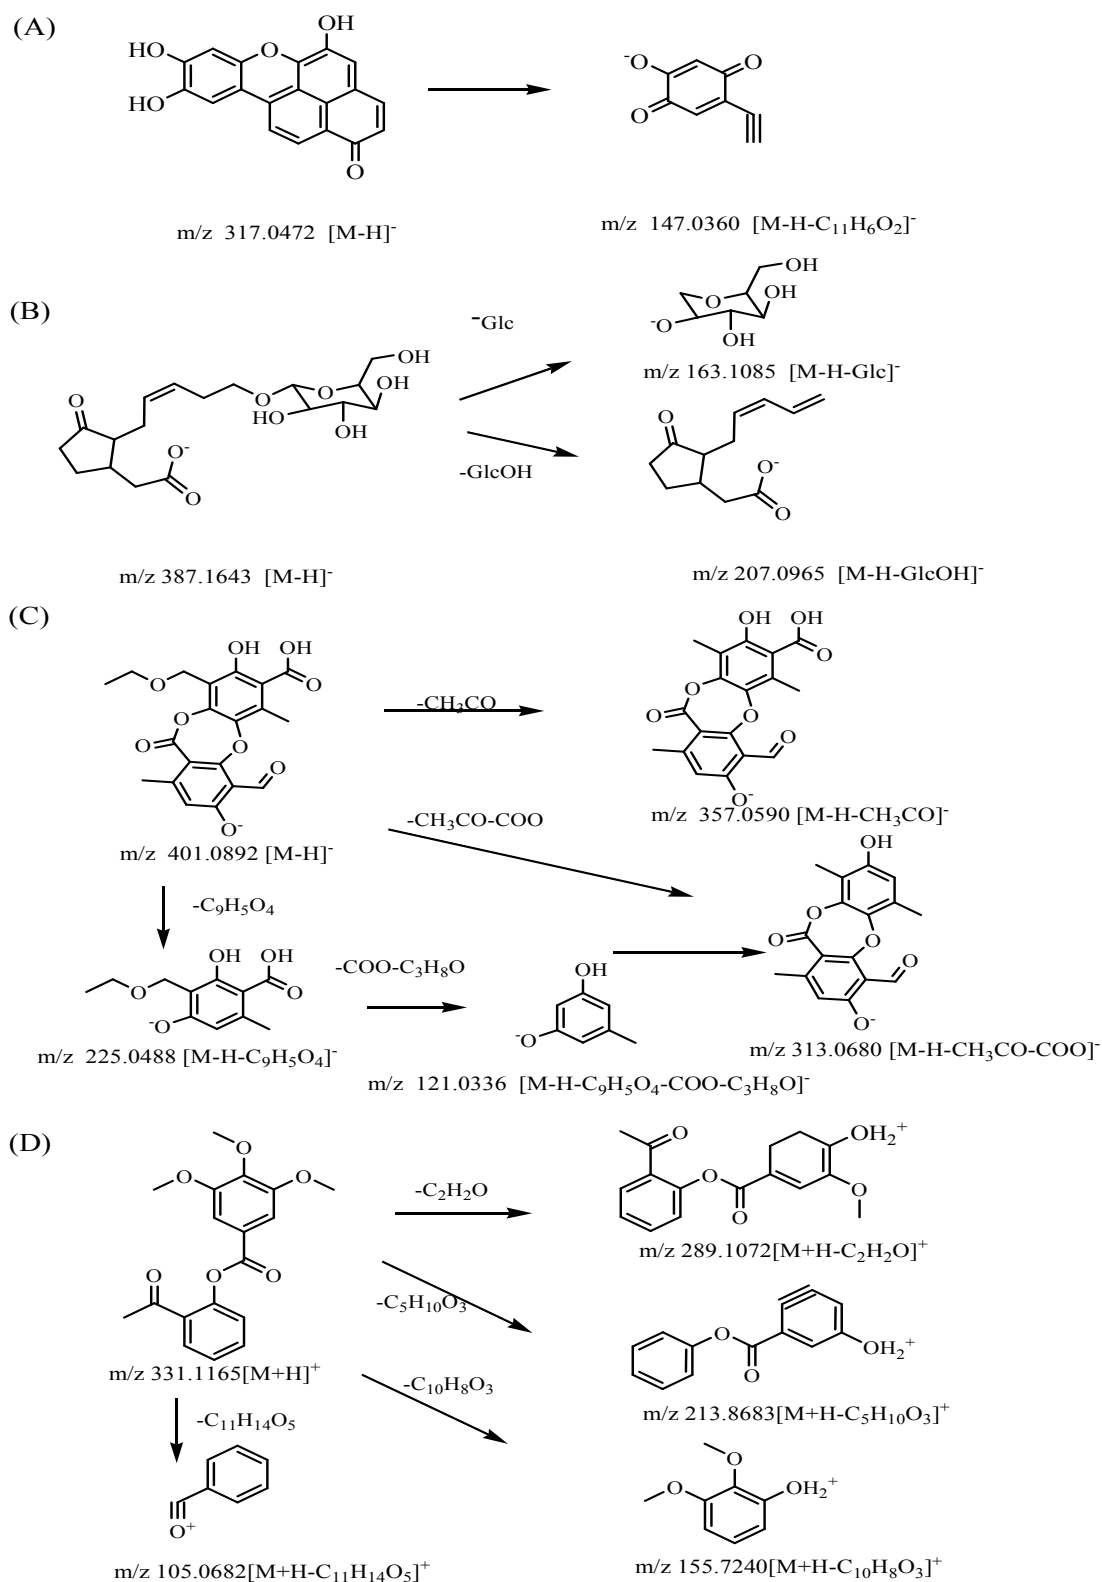

Supplemental Fig. A9 Proposed fragmentation pathways for 5,8,9-trihydroxy-1H-naphtho[2,1,8-mna]xanthen-1-one (A), tuberonic acid glucoside (B), cetraric acid (C) and 2-acetylphenyl 3,4,5-trimethoxybenzoate (D).
